# Supplementary material for: Relationships between the peak hypoxic ventilatory response and critical O2 tension in larval and adult zebrafish (Danio rerio)
Source: Oxford University Press journal article supplement (doi:10.1242/jeb.213942), 2020-01-01

**Figure S1.** Images of Tg(fli1:eGFP) zebrafish larvae (A) focusing on the head region.

Vasculature of the pharyngeal arches/gill regions (arrowheads) can be observed in 4, 7, 10, and 15 dpf larvae (B-E), with vasculature being more complex in 7, 10, and 15 dpf larvae compared to that of the 4 dpf larva. Scale bar represents 100  $\mu$ m.

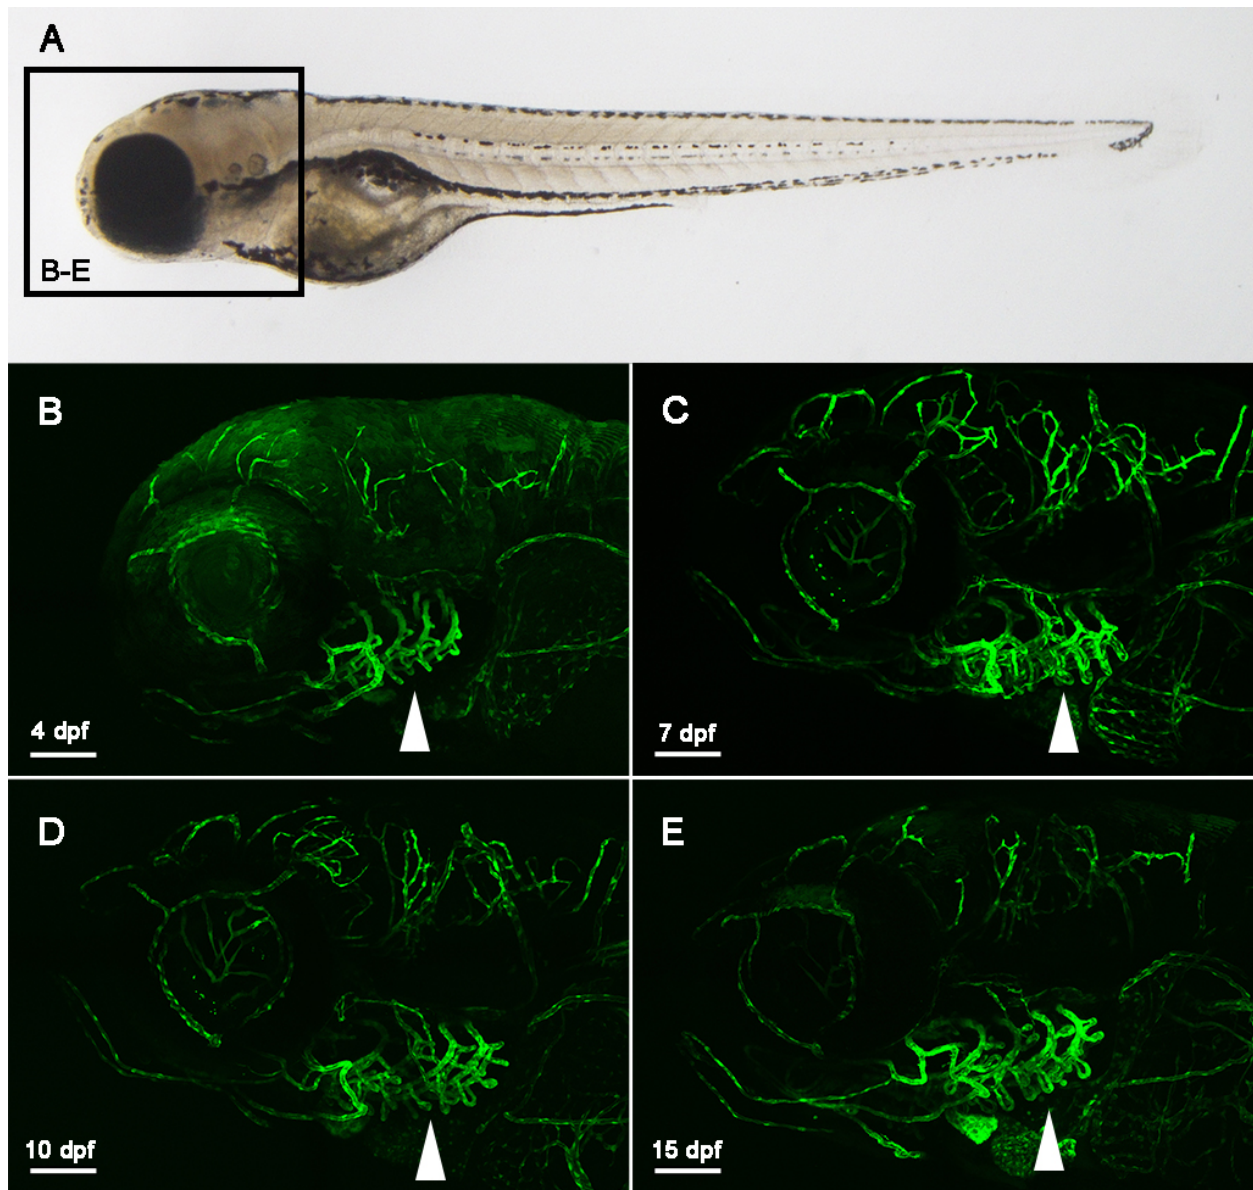

Supplement: jeb213942supp.pdf [file jeb213942supp.pdf]
